# Supplementary material
Source: MDPI journal article supplement (https://www.mdpi.com/2073-4395/11/11/2183)
Supplement: s1 [file s1]

## Supplementary Material

**Table S1.** Effects of water regime, inoculant type and their interaction on % AMF colonization. Analysis of Variance was applied on data from AMF inoculated and co-inoculated plants.

| Variable           | Water regime (1df) |                | Inoculant (1 df) |                | Water regime x Inoculant (1 df) |                |
|--------------------|--------------------|----------------|------------------|----------------|---------------------------------|----------------|
|                    | <i>F</i> value     | <i>P</i> value | <i>F</i> value   | <i>P</i> value | <i>F</i> value                  | <i>P</i> value |
| % AMF colonization | 186.9              | 0.000          | 434              | 0.000          | 83.07                           | 0.000          |

**Table S2.** Effects of water regime, inoculant type and their interaction on dry biomass per plant, as revealed by Two-way (n=4; C = Control, B = *B. subtilis*, M = AMF, MB = AMF and *B. subtilis*). Superscript letters correspond to significant differences between inoculant types as emerged from Fisher's test (a: denotes the highest value).

| Variable              | Water regime (1df) |                | Inoculant (3 df)                                                  |                |                | Water regime x Inoculant (3 df) |                |
|-----------------------|--------------------|----------------|-------------------------------------------------------------------|----------------|----------------|---------------------------------|----------------|
|                       | <i>F</i> value     | <i>P</i> value | <i>LSD</i>                                                        | <i>F</i> value | <i>P</i> value | <i>F</i> value                  | <i>P</i> value |
| Dry biomass/plant (g) | 36.83              | 0.000          | C <sup>bc</sup> +B <sup>ab</sup> +M <sup>c</sup> +MB <sup>a</sup> | 6.84           | 0.001          | 0.31                            | 0.814          |

**Table S3.** Effects of water regime, inoculant type and their interaction on soil enzyme activity, as revealed by Two-way ANOVA (\* P <0.05, \*\* P <0.01, \*\*\* P <0.001, for all cases n = 4) (C = control, B = *B. subtilis*, M = AMF, MB = AMF and *B. subtilis*). Superscript letters correspond to significant differences between inoculant types as emerged from Fisher's test (a: denotes the highest value).

| Enzymes          | Water regime (1df) |                | Inoculant type (3 df)                                           |                |                | Water regime x Inoculant type (3 df) |                |    |
|------------------|--------------------|----------------|-----------------------------------------------------------------|----------------|----------------|--------------------------------------|----------------|----|
|                  | <i>F</i> value     | <i>P</i> value | <i>LSD</i>                                                      | <i>F</i> value | <i>P</i> value | <i>F</i> value                       | <i>P</i> value |    |
| Acid phosphatase | 0.0293             | 0.8652         | C <sup>b</sup> +B <sup>b</sup> +M <sup>b</sup> +MB <sup>a</sup> | 3.086          | 0.0421         | 0.1603                               | 0.9222         | ns |
| Urease           | 0.2331             | 0.6327         | -                                                               | 0.0391         | 0.9895         | 0.4385                               | 0.727          | ns |
| β-glucosidase    | 1.4151             | 0.2435         | -                                                               | 0.2108         | 0.888          | 0.6576                               | 0.5845         | ns |

**Table S4.** Bonferroni corrected p-values of ANOSIM analysis based on Bray-Curtis index. Values in bold denote statistically significant differences among treatments. (B: *Bacillus*, C: control, M: AMF, MB: dual inoculant; 5 corresponds to 5% WC and 10 to 10 % WC).

|     | C10          | B5    | B10          | M5    | M10          | MB5          | MB10  |
|-----|--------------|-------|--------------|-------|--------------|--------------|-------|
| C5  | <b>0.047</b> | 1     | <b>0.048</b> | 0.512 | <b>0.048</b> | <b>0.049</b> | 0.162 |
| C10 |              | 0.392 | 1            | 0.210 | 0.267        | 0.218        | 1     |
| B5  |              |       | 0.238        | 1     | 1            | 0.212        | 1     |
| B10 |              |       |              | 0.506 | 1            | 0.235        | 1     |
| M5  |              |       |              |       | 0.235        | 1            | 1     |
| M10 |              |       |              |       |              | 0.235        | 0.212 |
| MB5 |              |       |              |       |              |              | 1     |

**Table S5.** Effects of water regime, inoculant type and their interaction on the multifunctionality index that derived from the z-scores of nine variables, as revealed by Two-way ANOVA (n = 4; C = control, B = *B. subtilis*, M = AMF, MB = AMF and *B. subtilis*). Superscript letters correspond to significant differences between inoculant types as emerged from Fisher's test (a: denotes the highest value).

|                                          | Water regime (1df) |                | Inoculant type (3 df)                                            |                | Water regime x Inoculant type (3 df) |                                  |
|------------------------------------------|--------------------|----------------|------------------------------------------------------------------|----------------|--------------------------------------|----------------------------------|
|                                          | <i>F</i> value     | <i>P</i> value | <i>LSD</i>                                                       | <i>F</i> value | <i>P</i> value                       | <i>F</i> value<br><i>P</i> value |
| <b>Multifunctionality index(z-score)</b> | 8.488              | 0.006          | C <sup>b</sup> +B <sup>bc</sup> +M <sup>c</sup> +MB <sup>a</sup> | 10.802         | 0.000                                | 1.699<br>0.188                   |

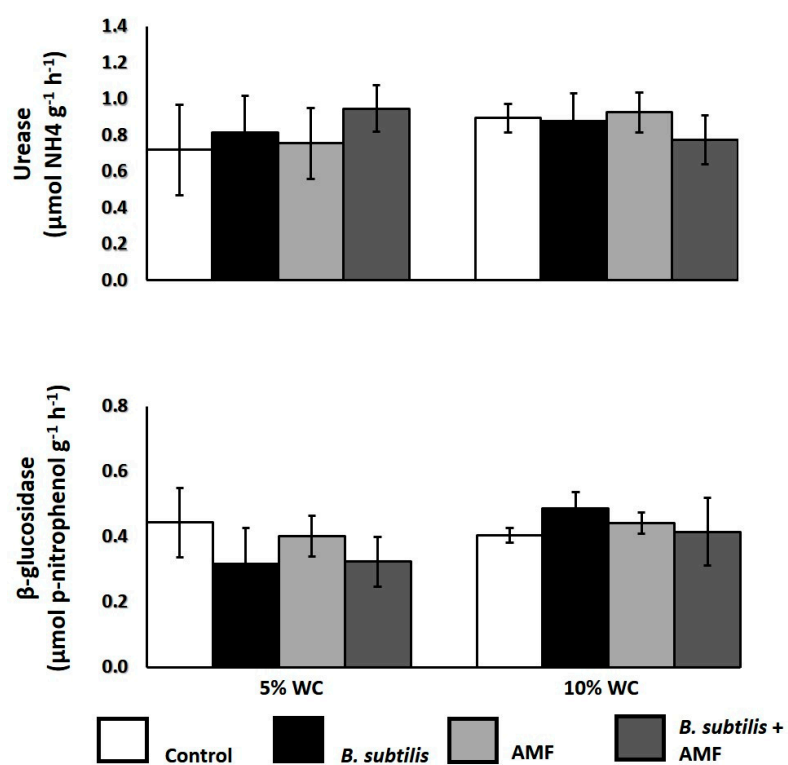

**Figure S1.** Mean values ( $\pm$  SE) of urease and  $\beta$ -glucosidase activity in soil samples of *Lactuca sativa* under different water regimes.
